# Supplementary material for: Failure analysis of railway switches and crossings for the purpose of preventive maintenance.
Source: Royal Society of Chemistry journal article supplement (doi:10.1039/c9ra09800c), 2011-01-01
Supplement: c9ra09800c1.pdf [file c9ra09800c1.pdf]

## Supplementary Information

We developed a web application that enables the user to calculate and fine-tune the model parameters in an interactive and visual fashion. Web application is accessible through the following link:

<http://ltpo2.fri1.uni-lj.si/dna/>

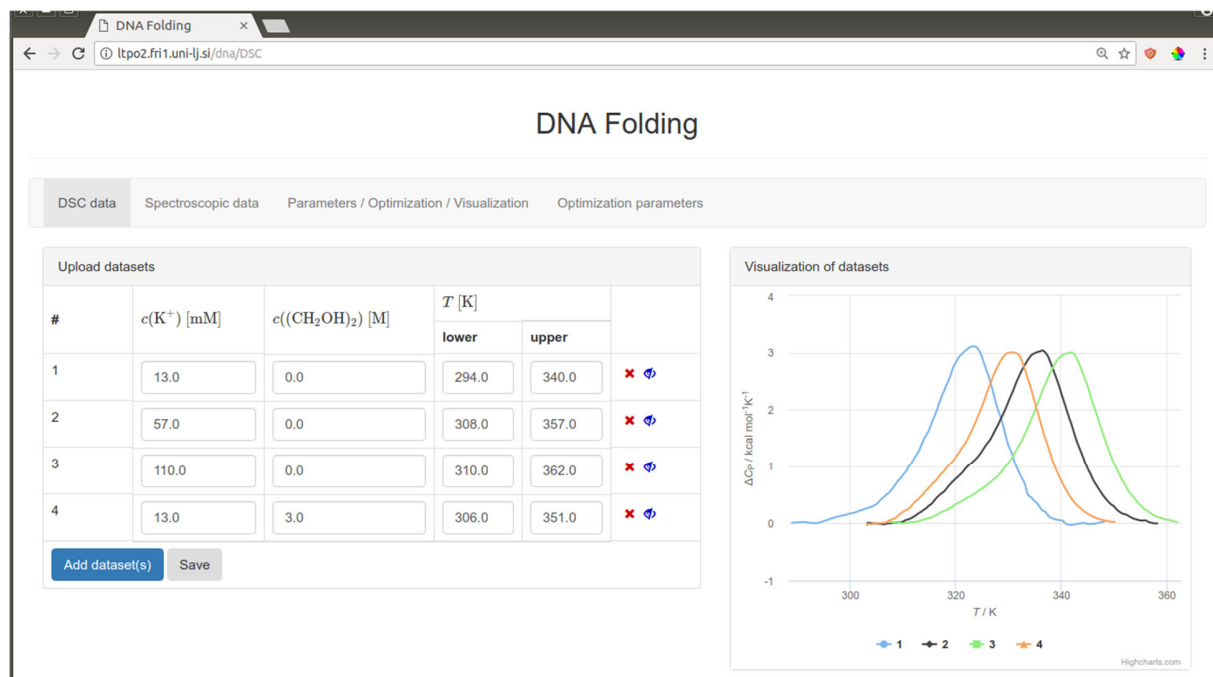

Fig. S1 User interface for the input of DSC data. The DSC curves are plotted in real time.

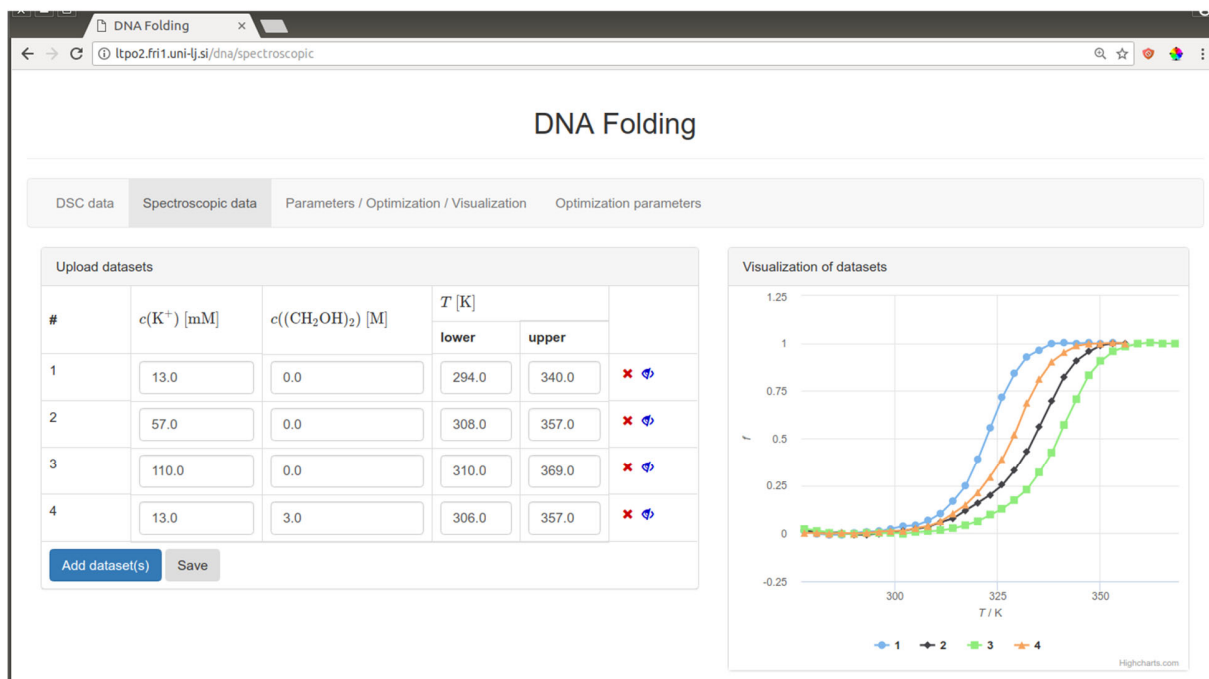

Fig. S2 User interface for the input of normalized CD melting curves. The normalized CD melting curves are plotted in real time.

DNA Folding

ltpo2.fri1.uni-lj.si/dna/parameters

## DNA Folding

DSC data   Spectroscopic data   **Parameters / Optimization / Visualization**   Optimization parameters

Browse ...

Upload

|                        | F → I                                    | I → U                                    | F → U  |                                       |
|------------------------|------------------------------------------|------------------------------------------|--------|---------------------------------------|
| $\Delta G_{ij}^o(T_0)$ | 4.19<br><small>±0.057   3.1 ↻</small>    | 5.67<br><small>±0.07   6.2 ↻</small>     | 9.86   | kcal mol <sup>-1</sup>                |
| $\Delta H_{ij}^o(T_0)$ | 36.84<br><small>±0.76   19.3 ↻</small>   | 7.75<br><small>±0.73   27.4 ↻</small>    | 44.59  | kcal mol <sup>-1</sup>                |
| $\Delta C_{P,ij}^o$    | -204.11<br><small>±12.0   92.8 ↻</small> | 475.90<br><small>±8.7   297.6 ↻</small>  | 271.79 | cal mol <sup>-1</sup> K <sup>-1</sup> |
| $n_{ij}$               | 0.48<br><small>±0.0079   0.5 ↻</small>   | 1.91<br><small>±0.011   1.7 ↻</small>    | 2.38   | mol                                   |
| $m_{ij}$               | -9.34<br><small>±0.38   -7.0 ↻</small>   | -34.21<br><small>±0.39   -33.0 ↻</small> | -43.55 | mol                                   |
| $f_{ij}$               | 0.61<br><small>±0.022   0.55 ↻</small>   |                                          |        |                                       |
| $T_0$                  | 298.15                                   |                                          |        | K                                     |

Redraw   Optimize   Optimize & Errors   Restore values before optimization   Download ...

Fig. S3 User interface for the input of the parameters. The parameters can be uploaded from a file or typed/ increased/ decreased manually. The errors are displayed under the parameter values.

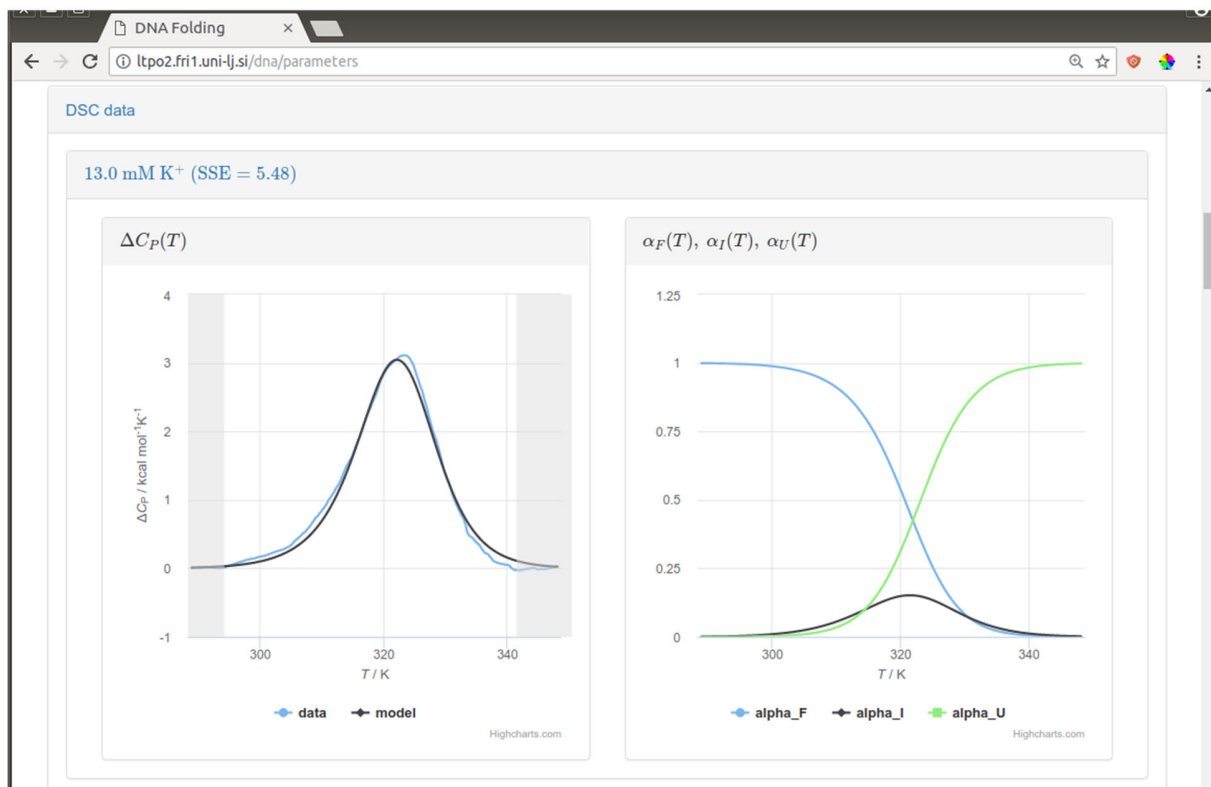

Fig. S4 Comparison of the fitting and experimental curves (left), and speciation diagram under the given conditions.

DNA Folding

DSC data   Spectroscopic data   Parameters / Optimization / Visualization   **Optimization parameters**

| Parameter              |       | Current value | Fixed                    | Lower bound          | Upper bound          |                                       |
|------------------------|-------|---------------|--------------------------|----------------------|----------------------|---------------------------------------|
| $\Delta G_{ij(T_0)}^o$ | F → I | 4.19          | <input type="checkbox"/> | <input type="text"/> | <input type="text"/> | kcal mol <sup>-1</sup>                |
|                        | I → U | 5.67          | <input type="checkbox"/> | <input type="text"/> | <input type="text"/> | kcal mol <sup>-1</sup>                |
| $\Delta H_{ij(T_0)}^o$ | F → I | 36.84         | <input type="checkbox"/> | <input type="text"/> | <input type="text"/> | kcal mol <sup>-1</sup>                |
|                        | I → U | 7.75          | <input type="checkbox"/> | <input type="text"/> | <input type="text"/> | kcal mol <sup>-1</sup>                |
| $\Delta C_{P,ij}^o$    | F → I | -204.11       | <input type="checkbox"/> | <input type="text"/> | <input type="text"/> | cal mol <sup>-1</sup> K <sup>-1</sup> |
|                        | I → U | 475.90        | <input type="checkbox"/> | <input type="text"/> | <input type="text"/> | cal mol <sup>-1</sup> K <sup>-1</sup> |
| $n_{ij}$               | F → I | 0.48          | <input type="checkbox"/> | <input type="text"/> | <input type="text"/> | mol                                   |
|                        | I → U | 1.91          | <input type="checkbox"/> | <input type="text"/> | <input type="text"/> | mol                                   |
| $m_{ij}$               | F → I | -9.34         | <input type="checkbox"/> | <input type="text"/> | <input type="text"/> | mol                                   |
|                        | I → U | -34.21        | <input type="checkbox"/> | <input type="text"/> | <input type="text"/> | mol                                   |
| $f_{ij}$               | F → I | 0.61          | <input type="checkbox"/> | <input type="text"/> | <input type="text"/> |                                       |

**Optimization / error estimation**

Number of function evaluations

Number of bootstrapping iterations

*These values affect the duration of the optimization and error estimation processes.*

[Save](#)

Fig. S5 User interface for the control of the parameters. The parameters can be fixed or limited by the upper and/or lower values, and the number of bootstrapping iterations can be set.
